# Supplementary material
Source: PubMed Central journal article supplement (PMC3494154)
Supplement: supp_M111.011114_supp_figures.pdf [file supp_M111.011114_supp_figures.pdf]

In-gel (314)

In-sol (485)

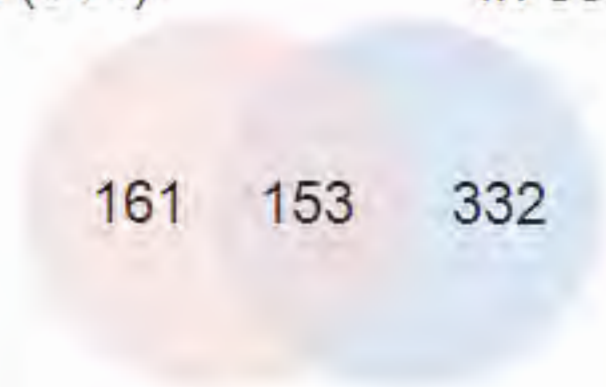

Union set: 646 ( $p < 0.1$ )

Union set (646)

PluriNet (299)

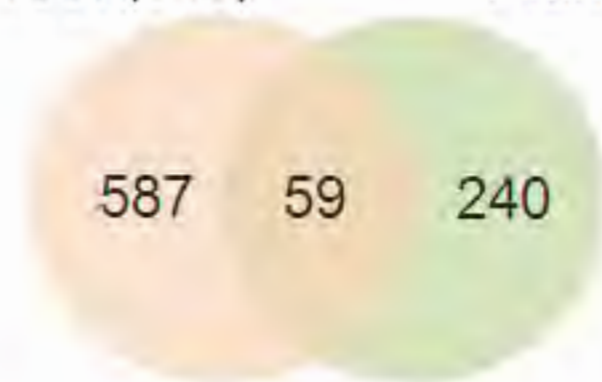

|        |   | In-gel |    |
|--------|---|--------|----|
|        |   | +      | -  |
| In-sol | + | 69     | 1  |
|        | - | 2      | 81 |

Total: 153  
Same trend: 98.04%

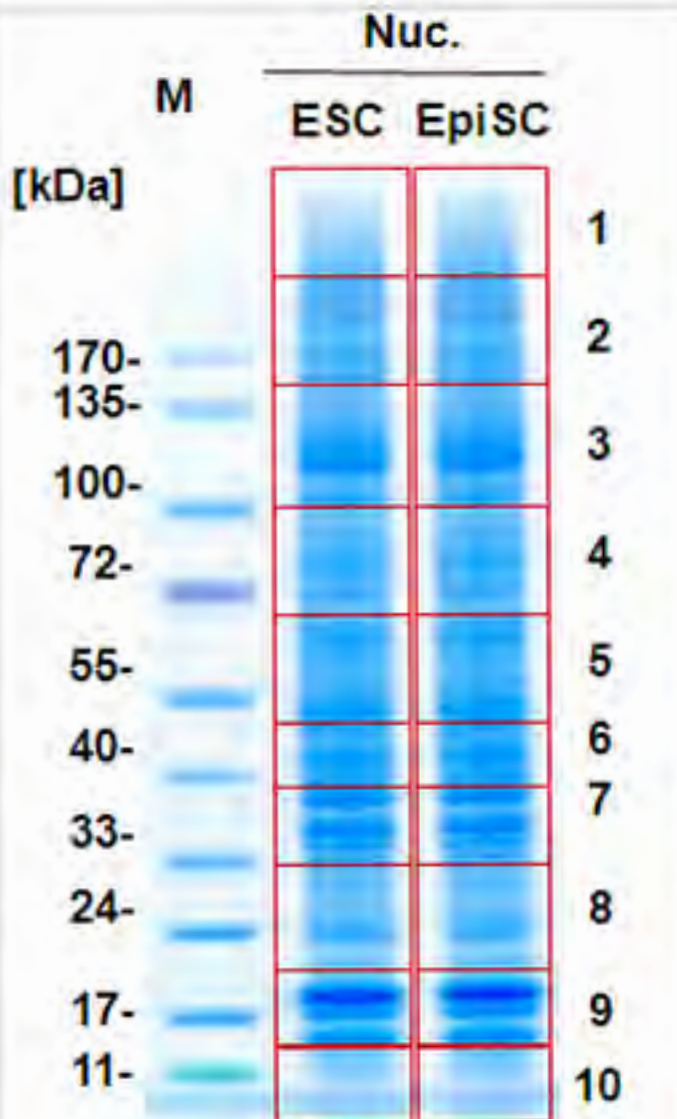

**M** - standard protein marker  
**Nuc.** - nucleus fraction

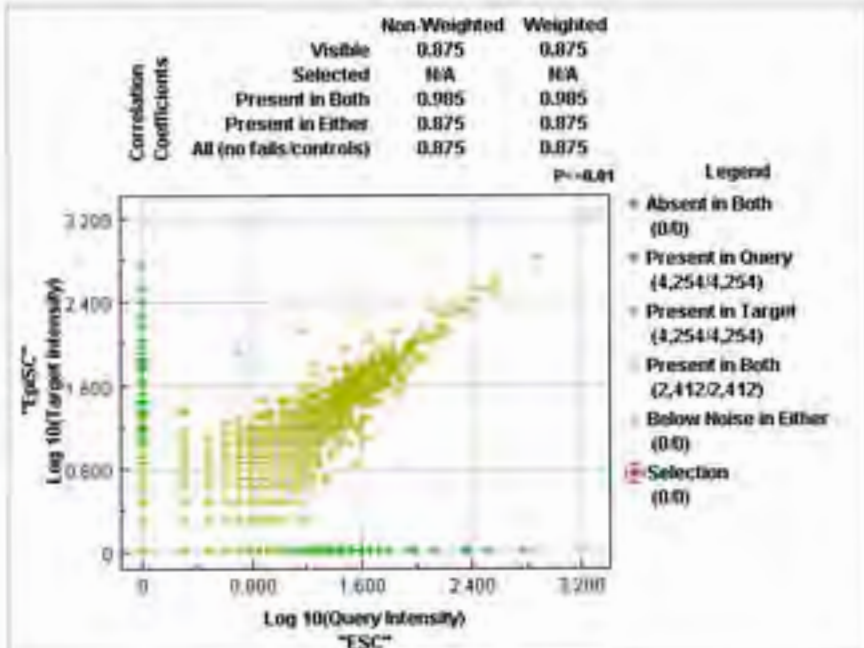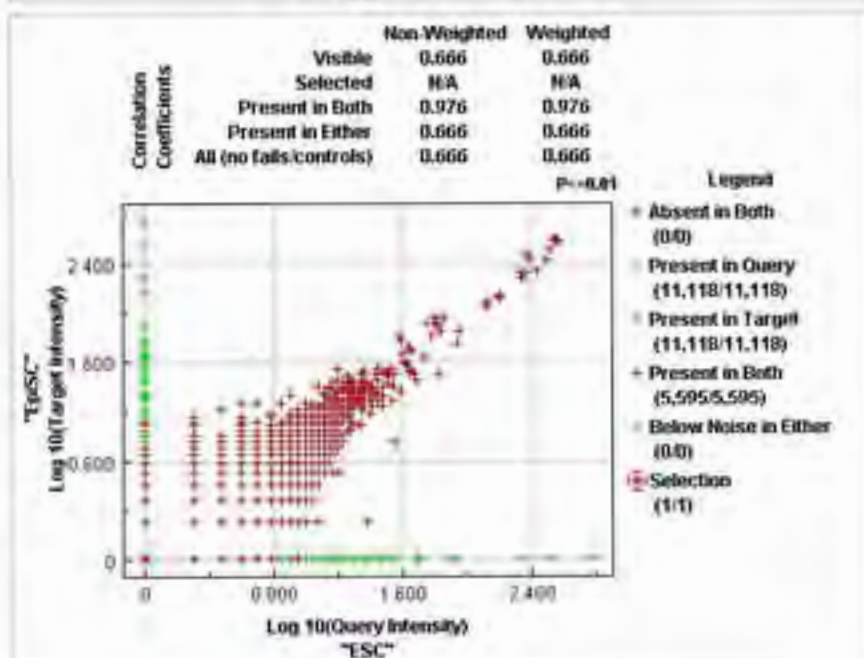

In-gel (955)

In-Sol (1461)

142 813 648

In-Gel

In-Sol

+

-

+

337

127

-

107

241

Proteomics data (union set  $p < 0.1$ )

|                                  |   | Proteomics data (union set $p < 0.1$ ) |     |       |
|----------------------------------|---|----------------------------------------|-----|-------|
|                                  |   | +                                      | -   |       |
| Microarray<br>Data ( $p < 0.1$ ) | + | 79                                     | 12  | n=259 |
|                                  | - | 39                                     | 129 |       |

Fisher's exact test

Two tailed p value = 0.0001

Percentage of same trend:  $208/259 = 80.3\%$
